# Supplementary material
Source: Springer Nature journal article supplement (https://www.springermedizin.de/resource/supplementary/12913_2006_382_MOESM5_ESM.pdf/9535064)
Supplement: MOESM5 [file 9535064]

Table 3. Two-part models of general practitioner, specialist, and hospital services (continued)

| Variable                                         | General practitioners |                                  |          | Specialists |                                  |          | Hospitals |                                  |      |
|--------------------------------------------------|-----------------------|----------------------------------|----------|-------------|----------------------------------|----------|-----------|----------------------------------|------|
|                                                  | Logistic              | Zero-truncated negative binomial |          | Logistic    | Zero-truncated negative binomial |          | Logistic  | Zero-truncated negative binomial |      |
|                                                  | OR                    | IRR                              | IRR      | OR          | IRR                              | IRR      | OR        | IRR                              | IRR  |
| Food allergies <sup>^</sup>                      | 0.86 *                | 0.93 **                          | 0.93 **  | 0.84 ***    | 0.95                             | 0.95     | 0.95      | 0.95                             | 1.00 |
| Other allergies <sup>^</sup>                     | 0.91 *                | 0.93 ***                         | 0.93 *** | 0.86        | 0.97                             | 0.96     | 0.96      | 0.92 *                           |      |
| Other allergies x age <sup>^^</sup>              |                       |                                  |          | ***         |                                  |          |           |                                  |      |
| Asthma <sup>^</sup>                              | 1.10                  | 1.04 *                           | 1.04 *   | 0.90 **     | 0.97                             | 1.13 *   | 1.13 *    | 0.97                             |      |
| Arthritis <sup>^</sup>                           | 1.19 ***              | 1.01                             | 1.01     | 1.00        | 0.93 *                           | 0.98     | 0.98      | 0.85 ***                         |      |
| High blood pressure <sup>^</sup>                 | 1.94 ***              | 1.20 ***                         | 1.20 *** | 0.85 ***    | 0.91                             | 1.12 *   | 1.12 *    | 0.57                             |      |
| High blood pressure x age <sup>^^</sup>          |                       |                                  |          |             |                                  |          |           | **                               |      |
| Migraine <sup>^</sup>                            | 0.87                  | 1.08 **                          | 1.08 **  | 0.89 **     | 0.94                             | 0.99     | 0.99      | 0.84 **                          |      |
| Migraine x age <sup>^^</sup>                     | ***                   |                                  |          |             |                                  |          |           |                                  |      |
| Urinary incontinence <sup>^</sup>                | 1.07                  | 0.93 *                           | 0.93 *   | 1.13 *      | 0.92                             | 1.14     | 1.14      | 1.13 *                           |      |
| Urinary incontinence x age <sup>^^</sup>         |                       |                                  |          |             |                                  |          |           |                                  |      |
| Diabetes <sup>^</sup>                            | 1.35 **               | 1.20                             | 1.20     | 1.02        | 1.08                             | 8.71 *** | 8.71 ***  | 1.10                             |      |
| Diabetes x age <sup>^^</sup>                     |                       | **                               | **       |             |                                  | ***      | ***       |                                  |      |
| Chronic bronchitis <sup>^</sup>                  | 1.12                  | 0.99                             | 0.99     | 0.84 **     | 0.95                             | 1.19 **  | 1.19 **   | 1.04                             |      |
| Heart disease <sup>^</sup>                       | 1.37 ***              | 1.13 ***                         | 1.13 *** | 1.60 ***    | 0.93                             | 1.91 *** | 1.91 ***  | 0.20 **                          |      |
| Heart disease x age <sup>^^</sup>                |                       |                                  |          |             |                                  |          |           | **                               |      |
| Cancer <sup>^</sup>                              | 0.26                  | 1.20 ***                         | 1.20 *** | 3.53 ***    | 1.64                             | 2.46     | 2.46      | 0.45                             |      |
| Cancer x age <sup>^^</sup>                       | ***                   |                                  |          |             | **                               | ***      | ***       | ***                              |      |
| Stomach or intestinal ulcers <sup>^</sup>        | 1.17                  | 1.10 **                          | 1.10 **  | 1.77 *      | 0.88 *                           | 1.15     | 1.15      | 0.92                             |      |
| Stomach or intestinal ulcers x age <sup>^^</sup> |                       |                                  |          | **          |                                  |          |           |                                  |      |
| Bowel disorders <sup>^</sup>                     | 1.37 *                | 1.10                             | 1.10     | 1.49 ***    | 1.05                             | 1.34 *** | 1.34 ***  | 3.55 ***                         |      |
| Bowel disorders x age <sup>^^</sup>              |                       |                                  |          |             |                                  |          |           | ***                              |      |
| Eye problem <sup>^</sup>                         | 0.76 **               | 0.90 ***                         | 0.90 *** | 0.84 ***    | 1.00                             | 0.96     | 0.96      | 0.91                             |      |
| Eye problem x age <sup>^^</sup>                  |                       |                                  |          |             |                                  |          |           |                                  |      |
| Thyroid condition <sup>^</sup>                   | 1.63 ***              | 1.06 *                           | 1.06 *   | 1.07        | 0.98                             | 0.92     | 0.92      | 0.87                             |      |
| Epilepsy <sup>^</sup>                            | 1.14                  | 0.99                             | 0.99     | 1.15        | 1.12                             | 1.34     | 1.34      | 1.16                             |      |
| Epilepsy x age <sup>^^</sup>                     |                       |                                  |          |             |                                  |          |           | ***                              |      |
| Chronic fatigue syndrome <sup>^</sup>            | 0.93                  | 1.05                             | 1.05     | 0.94        | 0.98                             | 0.84 *   | 0.84 *    | 1.18                             |      |
| Chronic fatigue syndrome x age <sup>^^</sup>     |                       |                                  |          |             |                                  |          |           | **                               |      |
| Stroke <sup>^</sup>                              | 2.17                  | 0.54                             | 0.54     | 0.80 *      | 0.99                             | 1.34 **  | 1.34 **   | 1.42 ***                         |      |
| Stroke x age <sup>^^</sup>                       | **                    | **                               | **       |             |                                  |          |           |                                  |      |
